# Supplementary material for: A first-in-human, open-label Phase 1b and a randomised, double-blind Phase 2a clinical trial in recent-onset type 1 diabetes with AG019 as monotherapy and in combination with teplizumab
Source: Springer Nature journal article supplement (doi:10.1007/s00125-023-06014-2), 2023-10-02
Supplement: MOESM1 [file 125_2023_6014_MOESM1_ESM.pdf]

## **ESM Methods**

### **Study population**

Ethnicity of participants was determined by means of a digital questionnaire, to examine the effect of AG019 between Hispanic or non-Hispanic people with type 1 diabetes.

### **Sample size**

The primary study objective of this study was to assess the safety and tolerability of AG019. The sample size in this FIH study was therefore not based on statistical considerations, but at least 4 participants per dose level in the AG019 monotherapy cohorts and 12 participants per dose level in the combination therapy cohorts were considered sufficient to evaluate safety and biological activity of AG019. A maximum of 48 patients were enrolled in clinical sites in the United States of America and Belgium.

### **Interim analyses**

Following interim analyses were performed:

- After the last Day 180 follow-up visit of the last participant enrolled into the Phase 1b part of the study, a preliminary analysis of the data collected up to 6 months was performed for these participants.
- Once all participants enrolled in the adult combination therapy cohort, as well as the 2 participants enrolled into the open-label part of the adolescent combination therapy cohort, had completed the Day 180 follow-up visit, unblinding was done and an interim analysis was performed.
- After the last Day 180 follow-up visit of the last patient participant into the adolescent combination therapy cohort, all participants in this cohort were unblinded and an interim

analysis was performed on all, which included an analysis of the primary endpoint of the study.

All decisions on data for blinded participants were taken before breaking the blind for the third interim analysis. Since this is a study of descriptive nature, with no statistical tests, the influence of the interim analyses was considered negligible.

### **Randomization and blinding**

All participants were registered in and randomization was performed through the Interactive Response Technology. Blinding of participants and all study personnel at the site was achieved using identical packaging for both active and placebo treatments.

### **Lab assessments**

The lab assessments have been performed by Eurofins BioPharma Services using validated methods. Glucose was measured using a Roche Glucose kit based on hexokinase enzymatic reaction (spectrophotometry); intra CV ranged from 0.8-1.7% and inter CV ranged from 2.9-4.7%. HbA1c was measured on a BioRad Variant II Classic system using a dedicated BioRad HbA1c kit. The methodology was based on HPLC Ion Exchange (chromatography) and CV ranged from 0.4-3.1% (intra-CV) and from 1.4-4.8% (inter-CV). C-Peptide was measured on Siemens Centaur XP system using dedicated Siemens C-Peptide kit. The method was based on immunologic reaction followed by chemiluminescence detection. The intra CV ranged from 3.4-3.9% and inter CV was 5.7%.

### **Analysis of antigen specific CD4<sup>+</sup> T cells in the circulation**

PBMCs were plated ( $5 \times 10^6$  cells/well) in the presence of anti-CD40 blocking antibody and MHC Class II optimized peptides from preproinsulin (PPI; for a full list of peptides, see **ESM Table 1**).

As a positive control for the assay, PBMCs were stimulated with a pool of 176 peptides from viral and bacterial antigens relevant to humans (CEFX, IDT Peptides). DMSO was used as a negative control. Cells were stimulated with peptides or DMSO for 18h at 37°C to allow for CD154 and CD137 upregulation on activated cells. The following day, stimulated cells were harvested, stained with an CD154-PE antibody and anti-PE coupled-magnetic beads were added. CD154<sup>+</sup> cells were enriched over a magnetic column, surfaced stained with antibodies for identification of CD4<sup>+</sup> conventional T cells (Tconv) and type 1 (inducible) regulatory T cells (Tr1 cells), and were fixed and permeabilized for intracellular cytokine staining. The column flow-through (containing CD154<sup>-</sup> cells) was then stained with a CD137-PE-Cy7 antibody, anti-PE magnetic beads were added, and cells were enriched over a second magnetic column. The eluted cells were surface stained with antibodies to identify CD4<sup>+</sup> Tregs and were fixed and permeabilized for cytokine and transcription factor staining (for a full list of antibodies, see **ESM Table 2**). Cells were analysed on a CYTEK Aurora spectral cytometer, data unmixed, and analysed using FlowJo v10.7.1.

Antigen responsive cells were gated as CD4<sup>+</sup>CD154<sup>+</sup>CD69<sup>+</sup> (Tconv, Tr1) or CD4<sup>+</sup>CD154<sup>-</sup>CD137<sup>+</sup>CD25<sup>+</sup> (Treg) using the DMSO negative control for each sample to set the gate for antigen responsive cells. Tr1 cells were gated based on co-expression of CD226<sup>+</sup>LAG3<sup>+</sup>CD49b<sup>+</sup>IL-10<sup>+</sup> and Treg cells were gated as CD25<sup>hi</sup>CD127<sup>low</sup>FOXP3<sup>+</sup>Helios<sup>+</sup>. Memory antigen-specific Treg and Tconv cells were gated as CD45RA<sup>-</sup>CD45RO<sup>+</sup>. To calculate the absolute number of antigen-reactive cells per million CD4 T cells, an aliquot (1/50) of cells was taken before the harvested cells were enriched for CD154 and CD137 expression. The frequency was calculated as: (#Ag stimulated enriched cells x 10<sup>6</sup>)/(#CD4 T cells in pre-sample x dilution factor).

Microbial antigen and DMSO control data were determined in parallel to the PPI-specific CD4<sup>+</sup> T-cell analysis. The microbial antigen control was used as a positive control for the assay and as a non-islet T cell response in relation to PPI T cell frequency and phenotype. The DMSO negative control was used to set the flow cytometry gate for T cells responding to peptides, *i.e.*, responses above the DMSO background.

### **Analysis of antigen specific CD8<sup>+</sup> T cells in the circulation**

Thawed cryopreserved PBMC samples ( $2 \times 10^6$  cells) from each time point for a single subject were individually stained with unique metal isotope labelled CD45 antibodies. All time points for a single subject were then combined, washed twice with PBS and stained for viability using cisplatin, followed by quenching and washing with protein-containing media. Cells were then pretreated with dasatinib and washed prior to staining with 50  $\mu$ L solution containing 1  $\mu$ L of each Class I Tetramer (Tmr) pool in running buffer for 15 minutes at 37°C. Without washing, 50  $\mu$ L of a frozen surface antibody cocktail was added, and the sample was incubated for an additional 30 minutes at 4°C. Samples were washed, fixed, and stained with a frozen intracellular antibody cocktail. Subsequently, samples were washed, fixed, and stored at 4°C overnight or for up to 1 week prior to acquisition. On the day of acquisition, cells were washed and resuspended in cold ultrapure water containing 1/5th EQ Four Element Calibration Beads by volume and acquired on a Helios CyTOF mass cytometer with a target cell acquisition of 1,000,000 live events at a rate of 500 events/second. Files were converted to .FCS and then randomized and normalized for EQ bead intensity using the CyTOF Software. FlowJo software v10.7.1 was used to export .FCS files and to gate CD8<sup>+</sup> T cell and Tmr<sup>+</sup> populations.

In a separate analysis, CD8<sup>+</sup> T cells (both total and PPI-specific) were manually gated in FlowJo for EOMES and TIGIT staining, identifying a population of partially exhausted EOMES<sup>+</sup>TIGIT<sup>+</sup> CD8<sup>+</sup> T-cells.

Changes in the frequency of (antigen-specific) CD8<sup>+</sup> T cells are reported as the log of the ratio of the frequency at a time point (month 3 or 6) to the frequency at month 0 (fold-change, FC). For this analysis, adult and adolescent patients were grouped and all available patients from the PD-PP population were included. One patient (an adult from the combination therapy group) had no HLA compatible with the PPI Tmr, and the frequency of Tmr<sup>+</sup> cells was below LOQ at all time points. Thus, this patient was not reported. Two patients from the combination therapy group were assayed at 2 months; these data were incorporated into the 3-month time point results.

**ESM Table 1. Peptides used for antigen specific T cell detection.**

|                  | <b>Protein</b> | <b>Sequence</b>       | <b>Position</b> | <b>Length</b> | <b>HLA</b> |
|------------------|----------------|-----------------------|-----------------|---------------|------------|
| Activation (AIM) | Preproinsulin  | MALWMRLLPLLALLALWGPDP | 1 - 20          | 20            | NA         |
|                  |                | PLLALLALWGPDPAAAFVNQ  | 9 - 28          | 20            | NA         |
|                  |                | WGPDPAAAFVNQHLCGSHLV  | 17 - 36         | 20            | NA         |
|                  |                | FVNQHLCGSHLVEALYLVC   | 25 - 44         | 20            | NA         |
|                  |                | SHLVEALYLVCGERGFFYTP  | 33 - 52         | 20            | NA         |
|                  |                | LVCGERGFFYTPKTRREAED  | 41 - 60         | 20            | NA         |
|                  |                | FYTPKTRREAEDLQVGQVEL  | 49 - 68         | 20            | NA         |
|                  |                | EAEDLQVGQVELGGGPGAGS  | 57 - 76         | 20            | NA         |
|                  |                | QVELGGGPGAGSLQPLALEG  | 65 - 84         | 20            | NA         |
|                  |                | GAGSLQPLALEGSLQKRGIV  | 73 - 92         | 20            | NA         |
|                  |                | ALEGSQKRGIVEQCCTSIC   | 81 - 100        | 20            | NA         |
|                  |                | RGIVEQCCTSICSLYQLENY  | 89 - 108        | 20            | NA         |
|                  |                | TSICSLYQLENYCN        | 97 - 116        | 14            | NA         |
|                  |                |                       |                 |               |            |
| Class I Tmr      | Preproinsulin  | ALWGPDPAAP            | 15-24           | 10            | A2         |
|                  |                | PLALEGSLQK            | 79-88           | 9             | A3         |
|                  |                | WLMRLLPLLAL           | 4-13            | 10            | B7         |
|                  |                | LPLLALLAL             | 8-16            | 8             | B7         |
|                  |                | ALWMLLLPL             | 2-10            | 9             | B8         |
|                  | CMV/EBV        | CMV pp50: VTEHDYLLY   | 245-253         | 9             | A1         |
|                  |                | CMV pp65: NLUPMUATV   | 495-503         | 9             | A2         |
|                  |                | CMV pp65: QYDPVAALF   | 341-349         | 9             | A24        |
|                  |                | CMV pp65: TPRVTGGGAM  | 417-426         | 10            | B7         |
|                  |                | CMV IE1: ELRRKMMYK    | 199-207         | 9             | B8         |
|                  |                | EBV LMP2: CLGGLLTMV   | 426-434         | 10            | A2         |
|                  |                | EBV BMLF1: DYNPVKQLF  | 320-328         | 9             | A24        |
|                  |                | EBV EBNA3A: FLRGAYGL  | 325-333         | 8             | B8         |
|                  |                |                       |                 |               |            |

NA: Not applicable, CMV: cytomegalovirus, EBV: Epstein-Barr virus, Tmr: tetramer, AIM: Activation-Induced Marker

Tmr specificities are labelled with two metals, but not a third Tmr metal and pooled for staining and analyses.

**ESM Table 2. Antibodies used for cytokine analysis.**

| <b>Panel</b>             | <b>Fluorophore/Metal</b> | <b>Specificity</b> | <b>Clone</b> | <b>Supplier</b> |
|--------------------------|--------------------------|--------------------|--------------|-----------------|
| <b>Spectral CD4-Tr1</b>  | BB515                    | CCR7               | 3D12         | BD Biosciences  |
|                          | viobrightFITC            | CXCR3              | REA232       | Miltenyi        |
|                          | BB700                    | IL-2               | MQ1-17H12    | BD Biosciences  |
|                          | PerCP-ef710              | IL-10              | JES3-9D7     | eBioscience     |
|                          | PE                       | CD154              | 5C8          | Miltenyi        |
|                          | PE-CF594                 | LAG3               | 11C3C65      | Biolegend       |
|                          | PE-Cy7                   | CD137              | 4-1BB        | Biolegend       |
|                          | APC                      | CD69               | FN50         | Biolegend       |
|                          | AF647                    | CTLA4              | BNI3         | Biolegend       |
|                          | AF700                    | CD45RA             | HI100        | Biolegend       |
|                          | APC-Cy7                  | PD-1               | EH12.2H7     | Biolegend       |
|                          | BV421                    | CCR4               | L291H4       | Biolegend       |
|                          | ef450                    | TNFA               | MAb11        | eBioscience     |
|                          | BV480                    | TIGIT              | 741182       | BD Biosciences  |
|                          | BV510                    | CCR6               | 11A9         | BD Biosciences  |
|                          | BV570                    | CD45RO             | UCHL1        | Biolegend       |
|                          | BV605                    | CD4                | RPA-T4       | Biolegend       |
|                          | BV650                    | CD27               | O323         | Biolegend       |
|                          | BV711                    | CD25               | 2A3          | BD Biosciences  |
|                          | BV750                    | CD49b              | AK7          | BD Biosciences  |
|                          | BV785                    | CD95               | DX2          | Biolegend       |
|                          | BUV395                   | CD38               | HB7          | BD Biosciences  |
|                          | BUV450                   | LIVE/DEAD BLUE     |              | Thermo fisher   |
|                          | BUV496                   | CD3                | UCHT1        | BD Biosciences  |
|                          | BUV563                   | CD226              | DX11         | BD Biosciences  |
|                          | BUV661                   | HLA-DR             | G46-6        | BD Biosciences  |
|                          | BUV737                   | CD14               | M5E2         | BD Biosciences  |
|                          | BUV737                   | CD19               | SJ25C1       | BD Biosciences  |
|                          | BUV737                   | CD56               | NCAM16.2     | BD Biosciences  |
| <b>Spectral CD4 Treg</b> | AF488                    | Helios             | 22F6         | Biolegend       |
|                          | PerCP-ef710              | IL-10              | WD1928       | ebioscience     |
|                          | PE                       | CD154              | 5C8          | Miltenyi        |
|                          | PE-Dz594                 | LAG3               | 11C3C65      | Biolegend       |
|                          | PE/Cy5                   | Foxp3              | 236A/E6      | ebioscience     |
|                          | PE-Cy7                   | CD137              | 4-1BB        | Biolegend       |
|                          | APC                      | CD69               | FN50         | Biolegend       |
|                          | AF647                    | KLRG1              | SA231A2      | Biolegend       |
|                          | AF700                    | CD45RA             | HI100        | Biolegend       |
|                          | APC-Cy7                  | CCR7               | G043H7       | Biolegend       |
|                          | BV421                    | TIM3               | F38-2E2      | Biolegend       |
|                          | ef450                    | CD127              | eBioRDR5     | eBioscience     |
|                          | BV480                    | TIGIT              | 741182       | BD Biosciences  |
|                          | BV510                    | PD-1               | EH12.1       | BD Biosciences  |
|                          | BV570                    | CD45RO             | UCHL1        | Biolegend       |

|                  |                |                   |          |                   |
|------------------|----------------|-------------------|----------|-------------------|
|                  | BV605          | CD4               | RPA-T4   | Biolegend         |
|                  | BV750          | CD27              | O323     | Biolegend         |
|                  | superbright702 | GARP              | G14D9    | eBioscience       |
|                  | BV785          | CTLA4             | BNI3     | Biolegend         |
|                  | BUV395         | CD38              | HB7      | BD Horizon        |
|                  | BUV450         | LIVE/DEAD<br>BLUE |          | Thermo fisher     |
|                  | BUV496         | CD3               | UCHT1    | BD Horizon        |
|                  | BUV563         | CD25              | 2A3      | BD Horizon        |
|                  | BUV661         | CD39              | TU66     | BD Opti           |
|                  | BUV737         | CD14              | M5E2     | BD Horizon        |
|                  | BUV737         | CD19              | SJ25C1   | BD Horizon        |
|                  | BUV737         | CD56              | NCAM16.2 | BD Horizon        |
|                  | BUV805         | CD8               | SK1      | BD Horizon        |
| <b>CyTOF Tmr</b> | 89Y            | CD45              | HI30     | Standard BioTools |
|                  | 106Cd          | CD8a              | RPA-T8   | Biolegend*        |
|                  | 110Cd          | CD3               | UCHT1    | Biolegend*        |
|                  | 111Cd          | CD45              | HI30     | Standard BioTools |
|                  | 112Cd          | CD45              | HI30     | Standard BioTools |
|                  | 113Cd          | CD4               | RPA-T4   | Biolegend*        |
|                  | 114Cd          | CD11c             | Bu15     | Biolegend*        |
|                  | 116Cd          | HLA-DR            | L243     | Biolegend*        |
|                  | 141Pr          | Granzyme B        | QA16A02  | Biolegend*        |
|                  | 142Nd          | CD57              | HCD57    | Standard BioTools |
|                  | 143Nd          | CD45RA            | HI100    | Standard BioTools |
|                  | 144Nd          | CD38              | HIT2     | Standard BioTools |
|                  | 145Nd          | $\alpha 4\beta 7$ | NA       | ENTYVIO           |
|                  | 146Nd          | KIR2DL1           | HP-MA4   | Biolegend*        |
|                  | 146Nd          | KIR2DL2           | DX27     | Biolegend*        |
|                  | 146Nd          | KIR3DL1           | DX9      | Biolegend*        |
|                  | 147Sm          | KLRG1             | 14C2A07  | Biolegend*        |
|                  | 148Nd          | CD14              | M5E2     | Biolegend*        |
|                  | 149Sm          | CD127             | A019D5   | Standard BioTools |
|                  | 150Nd          | CX3CR1            | 2A9-1    | eBioscience*      |
|                  | 151Eu          | Helios            | 22F6     | Biolegend*        |
|                  | 152Sm          | CD2               | TS1/8    | Biolegend*        |
|                  | 153Eu          | Lag3              | 11C3C65  | Biolegend*        |
|                  | 154Sm          | TIGIT             | MBSA43   | Standard BioTools |
|                  | 155Dy          | Tcf1/7            | 7F11A10  | Biolegend*        |
|                  | 156Gd          | CD25              | M-A251   | Biolegend*        |
|                  | 158Gd          | CD27              | L128     | Standard BioTools |
|                  | 159Tb          | CD161             | HP3G10   | Standard BioTools |
|                  | 160Gd          | T-bet             | 4B10     | Standard BioTools |
|                  | 161Dy          | CD39              | A1       | Biolegend*        |
|                  | 162Dy          | Eomes             | WO1928   | eBioscience*      |
|                  | 163Dy          | CXCR3             | G025H7   | Standard BioTools |
|                  | 164Dy          | CD95              | DX2      | Standard BioTools |
|                  | 165Ho          | CD19              | HIB19    | Standard BioTools |
|                  | 166Er          | CD49b             | P1E6-C5  | Biolegend*        |



|  |       |                         |            |                    |
|--|-------|-------------------------|------------|--------------------|
|  | 167Er | CCR7                    | G043H7     | Standard Bio Tools |
|  | 168Er | Tmr                     |            |                    |
|  | 169Tm | Tmr                     |            |                    |
|  | 170Er | CD122                   | TU27       | Standard BioTools  |
|  | 171Yb | CD103                   | Ber-ACT8   | Biolegend*         |
|  | 172Yb | Ki-67                   | B56(Ki-67) | Biolegend*         |
|  | 173Yb | TCRgd                   | B1         | Biolegend*         |
|  | 174Yb | Tmr                     |            |                    |
|  | 175Yb | PD1                     | EH12.2H7   | Standard BioTools  |
|  | 176Yb | CD56                    | NCAM16.2   | BD Biosciences*    |
|  | 191Ir | Iridium<br>intercalator |            | Standard BioTools  |
|  | 193Ir | Iridium<br>intercalator |            | Standard BioTools  |
|  | 198Pt | Cisplatin               |            | Standard BioTools  |
|  | 209Bi | CD16                    | 3G8        | Standard BioTools  |

**For CyTOF:** Unlabeled purified antibodies were conjugated to metal isotopes using Maxpar X8 and MCP9 Antibody Labeling Kits (Standard BioTools) as per manufacturer's instructions. All samples from the same subject were barcoded and combined for staining. Tmr gating was applied to all samples in the same subject, guided by subjects that were negative for TMr HLA's (Tmr+<0.03%, LOQ). Double labelled cells were counted, single and triple labelled cells were excluded.

**ESM Table 3. Summary of treatment emergent adverse events according to severity**

**A: AG019 monotherapy cohorts (Phase 1b)**

|              | Adolescents, low dose<br>n=4 |                       | Adolescents, high dose<br>n=5 |                       | Adults, low dose<br>n=5 |                       | Adults, high dose<br>n=5 |                       |
|--------------|------------------------------|-----------------------|-------------------------------|-----------------------|-------------------------|-----------------------|--------------------------|-----------------------|
|              | TEAEs<br>n                   | Participants<br>n (%) | TEAEs<br>n                    | Participants<br>n (%) | TEAEs<br>n              | Participants<br>n (%) | TEAEs<br>n               | Participants<br>n (%) |
| GRADE 1      | 27                           | 4 (100%)              | 27                            | 4 (80%)               | 8                       | 4 (80%)               | 24                       | 5 (100%)              |
| GRADE 2      | 9                            | 4 (100%)              | 3                             | 3 (60%)               | 2                       | 2 (40%)               | 7                        | 3 (60%)               |
| GRADE 3      | 0                            | 0 (0%)                | 0                             | 0 (0%)                | 0                       | 0 (0%)                | 0                        | 0 (0%)                |
| GRADE 4      | 0                            | 0 (0%)                | 0                             | 0 (0%)                | 0                       | 0 (0%)                | 0                        | 0 (0%)                |
| GRADE 5      | 0                            | 0 (0%)                | 0                             | 0 (0%)                | 0                       | 0 (0%)                | 0                        | 0 (0%)                |
| <b>TOTAL</b> | <b>36</b>                    | <b>4 (100%)</b>       | <b>30</b>                     | <b>4 (80%)</b>        | <b>10</b>               | <b>4 (80%)</b>        | <b>31</b>                | <b>5 (100%)</b>       |

TEAE = Treatment Emergent Adverse Event; n = number

Grade 1 = Mild; Grade 2 = Moderate; Grade 3 = Severe; Grade 4 = Life-threatening; Grade 5 = Death

**B: AG019/Teplizumab combination therapy cohorts (Phase 2a)**

|              | Adolescents,<br>AG019/Teplizumab<br>n=5 |                       | Adolescents, Placebo<br>n=1 |                       | Adults,<br>AG019/Teplizumab<br>n=10 |                       | Adults, Placebo<br>n=2 |                       |
|--------------|-----------------------------------------|-----------------------|-----------------------------|-----------------------|-------------------------------------|-----------------------|------------------------|-----------------------|
|              | TEAEs<br>n                              | Participants<br>n (%) | TEAEs<br>n                  | Participants<br>n (%) | TEAEs<br>n                          | Participants<br>n (%) | TEAEs<br>n             | Participants<br>n (%) |
| GRADE 1      | 16                                      | 4 (80%)               | 2                           | 1 (100%)              | 84                                  | 9 (90%)               | 27                     | 2 (100%)              |
| GRADE 2      | 9                                       | 5 (100%)              | 0                           | 0 (0%)                | 35                                  | 8 (80%)               | 10                     | 2 (100%)              |
| GRADE 3      | 1                                       | 1 (20%)               | 0                           | 0 (0%)                | 7                                   | 5 (50%)               | 0                      | 0 (0%)                |
| GRADE 4      | 0                                       | 0 (0%)                | 0                           | 0 (0%)                | 1                                   | 1 (10%)               | 0                      | 0 (0%)                |
| GRADE 5      | 0                                       | 0 (0%)                | 0                           | 0 (0%)                | 0                                   | 0 (0%)                | 0                      | 0 (0%)                |
| <b>TOTAL</b> | <b>26</b>                               | <b>5 (100%)</b>       | <b>2</b>                    | <b>1 (100%)</b>       | <b>127</b>                          | <b>10 (100%)</b>      | <b>37</b>              | <b>2 (100%)</b>       |

TEAE = Treatment Emergent Adverse Event; n = number

Grade 1 = Mild; Grade 2 = Moderate; Grade 3 = Severe; Grade 4 = Life-threatening; Grade 5 = Death

**ESM Table 4. Summary of treatment emergent adverse events according to System Organ Class  
A: AG019 monotherapy cohorts (Phase 1b).**

|                                                      | Adolescents, low dose<br>n=4 |                       | Adolescents, high dose<br>n=5 |                       | Adults, low dose<br>n=5 |                       | Adults, high dose<br>n=5 |                       |
|------------------------------------------------------|------------------------------|-----------------------|-------------------------------|-----------------------|-------------------------|-----------------------|--------------------------|-----------------------|
|                                                      | TEAEs<br>n                   | Participants<br>n (%) | TEAEs<br>n                    | Participants<br>n (%) | TEAEs<br>n              | Participants<br>n (%) | TEAEs<br>n               | Participants<br>n (%) |
| Blood and lymphatic system disorders                 | 7                            | 3 (75%)               | 3                             | 2 (40%)               | 0                       | 0 (0%)                | 2                        | 1 (20%)               |
| Gastrointestinal disorders                           | 5                            | 2 (50%)               | 5                             | 2 (40%)               | 1                       | 1 (20%)               | 4                        | 2 (40%)               |
| General disorders and administration site conditions | 2                            | 1 (25%)               | 1                             | 1 (20%)               | 0                       | 0 (0%)                | 1                        | 1 (20%)               |
| Immune system disorders                              | 1                            | 1 (25%)               | 0                             | 0 (0%)                | 0                       | 0 (0%)                | 1                        | 1 (20%)               |
| Infections and infestations                          | 4                            | 4 (100%)              | 6                             | 3 (60%)               | 8                       | 4 (80%)               | 7                        | 3 (60%)               |
| Injury, poisoning and procedural complications       | 2                            | 1 (25%)               | 3                             | 2 (40%)               | 0                       | 0 (0%)                | 4                        | 2 (40%)               |
| Investigations                                       | 3                            | 2 (50%)               | 4                             | 1 (20%)               | 0                       | 0 (0%)                | 5                        | 2 (40%)               |
| Metabolism and nutrition disorders                   | 3                            | 2 (50%)               | 0                             | 0 (0%)                | 0                       | 0 (0%)                | 0                        | 0 (0%)                |
| Musculoskeletal and connective tissue disorders      | 2                            | 1 (25%)               | 3                             | 2 (40%)               | 0                       | 0 (0%)                | 0                        | 0 (0%)                |
| Nervous system disorders                             | 1                            | 1 (25%)               | 2                             | 1 (20%)               | 0                       | 0 (0%)                | 2                        | 1 (20%)               |
| Psychiatric disorders                                | 1                            | 1 (25%)               | 1                             | 1 (20%)               | 0                       | 0 (0%)                | 0                        | 0 (0%)                |
| Respiratory, thoracic and mediastinal disorders      | 2                            | 1 (25%)               | 2                             | 1 (20%)               | 0                       | 0 (0%)                | 1                        | 1 (20%)               |
| Skin and subcutaneous tissue disorders               | 1                            | 1 (25%)               | 0                             | 0 (0%)                | 1                       | 1 (20%)               | 4                        | 3 (60%)               |

TEAE = Treatment Emergent Adverse Event; n = number

No TEAEs were detected in the following System Organ Class (SOC): Cardiac disorders, Eye disorders, Vascular disorders. One TEAE was reported for the following SOC: Ear and labyrinth disorders, Reproductive system and breast disorders (in 1 adolescent treated with AG019 low dose).

**B: AG019/Teplizumab combination therapy cohorts (Phase 2a).**

|                                                      | <b>Adolescents,<br/>AG019/Teplizumab<br/>n=5</b> |                               | <b>Adolescents, Placebo<br/>n=1</b> |                               | <b>Adults,<br/>AG019/Teplizumab<br/>n=10</b> |                               | <b>Adults, Placebo<br/>n=2</b> |                               |
|------------------------------------------------------|--------------------------------------------------|-------------------------------|-------------------------------------|-------------------------------|----------------------------------------------|-------------------------------|--------------------------------|-------------------------------|
|                                                      | <b>TEAEs<br/>n</b>                               | <b>Participants<br/>n (%)</b> | <b>TEAEs<br/>n</b>                  | <b>Participants<br/>n (%)</b> | <b>TEAEs<br/>n</b>                           | <b>Participants<br/>n (%)</b> | <b>TEAEs<br/>n</b>             | <b>Participants<br/>n (%)</b> |
| Blood and lymphatic system disorders                 | 1                                                | 1 (20%)                       | 0                                   | 0 (0%)                        | 17                                           | 5 (50%)                       | 2                              | 2 (100%)                      |
| Gastrointestinal disorders                           | 4                                                | 3 (60%)                       | 0                                   | 0 (0%)                        | 28                                           | 7 (70%)                       | 3                              | 2 (100%)                      |
| General disorders and administration site conditions | 4                                                | 2 (40%)                       | 0                                   | 0 (0%)                        | 8                                            | 4 (40%)                       | 7                              | 2 (100%)                      |
| Infections and infestations                          | 0                                                | 0 (0%)                        | 0                                   | 0 (0%)                        | 10                                           | 7 (70%)                       | 2                              | 1 (50%)                       |
| Injury, poisoning and procedural complications       | 1                                                | 1 (20%)                       | 0                                   | 0 (0%)                        | 3                                            | 3 (30%)                       | 0                              | 0 (0%)                        |
| Investigations                                       | 6                                                | 4 (80%)                       | 0                                   | 0 (0%)                        | 18                                           | 5 (50%)                       | 0                              | 0 (0%)                        |
| Musculoskeletal and connective tissue disorders      | 1                                                | 1 (20%)                       | 0                                   | 0 (0%)                        | 9                                            | 3 (30%)                       | 4                              | 2 (100%)                      |
| Nervous system disorders                             | 3                                                | 1 (20%)                       | 0                                   | 0 (0%)                        | 9                                            | 5 (50%)                       | 11                             | 2 (100%)                      |
| Psychiatric disorders                                | 4                                                | 1 (20%)                       | 2                                   | 1 (100%)                      | 1                                            | 1 (10%)                       | 0                              | 0 (0%)                        |
| Reproductive system and breast disorders             | 0                                                | 0 (0%)                        | 0                                   | 0 (0%)                        | 2                                            | 2 (20%)                       | 0                              | 0 (0%)                        |
| Respiratory, thoracic and mediastinal disorders      | 1                                                | 1 (20%)                       | 0                                   | 0 (0%)                        | 8                                            | 3 (30%)                       | 5                              | 1 (50%)                       |
| Skin and subcutaneous tissue disorders               | 1                                                | 1 (20%)                       | 0                                   | 0 (0%)                        | 10                                           | 6 (60%)                       | 1                              | 1 (50%)                       |

TEAE = Treatment Emergent Adverse Event; n = number

One TEAE was reported for the following SOC: Cardiac disorders, Eye disorders, Immune system disorders, Vascular disorders (in 1 adult treated with AG019/Teplizumab); Ear and labyrinth disorders, Metabolism and nutrition disorders (in 1 adult treated with placebo).

**ESM Table 5. Overview of participants with incomplete teplizumab treatment.**

| Age Group  | Number of infusions | Reason for teplizumab discontinuation |
|------------|---------------------|---------------------------------------|
| Adolescent | 2/12                | Hy's Law                              |
| Adult      | 8/12                | Elevated ALT and AST                  |
| Adult      | 1/12                | Neutropenia                           |
| Adult      | 2/12                | Cytokine Release Syndrome             |
| Adult      | 11/12               | Elevated ALT                          |

*ALT = alanine transaminase, ASP = aspartate aminotransferase*

**ESM Table 6. Responder analysis at 6 months and at 12 months, expressed as a proportion and as a percentage per age and treatment group.**

|                                                                      |                            | AG019 Monotherapy |            | AG019/Teplizumab Combination Therapy |             | Placebo  |          |
|----------------------------------------------------------------------|----------------------------|-------------------|------------|--------------------------------------|-------------|----------|----------|
|                                                                      |                            | 6M                | 12M        | 6M                                   | 12M         | 6M       | 12M      |
| Number of Responders                                                 | Adults % (proportion)      | 55% (5/9)         | 22% (2/9)  | 70% (7/10)                           | 67% (6/9)   | 0% (0/2) | 0% (0/1) |
|                                                                      | Adolescents % (proportion) | 28% (2/7)         | 16% (1/6)  | 100% (4/4)                           | 100% (4/4)  | 0% (0/1) | -        |
|                                                                      | Total % (proportion)       | 44% (7/16)        | 20% (3/15) | 78% (11/14)                          | 77% (10/13) | 0% (0/3) | 0% (0/1) |
| Mean change from baseline in C-peptide mean 2-hour AUC in responders | Adults (n)                 | 102% (5)          | 76% (2)    | 127% (7)                             | 114% (6)    | -        | -        |
|                                                                      | Adolescents (n)            | 113% (2)          | 104% (1)   | 124% (4)                             | 108% (4)    | -        | -        |
|                                                                      | Total (n)                  | 105% (7)          | 84% (3)    | 126% (11)                            | 112% (10)   | -        | -        |

Data are based on the PP. The 2-hour mean C-peptide AUC was used to identify treatment responders (28); a patient was classified as responder when the change from baseline was either non-negative or, if negative, represented a coefficient of variance (CV) was  $\leq 9.7\%$  (28, 29). M=month, n=number. AUC = area under the curve.

**ESM Fig. 1: Study Design**

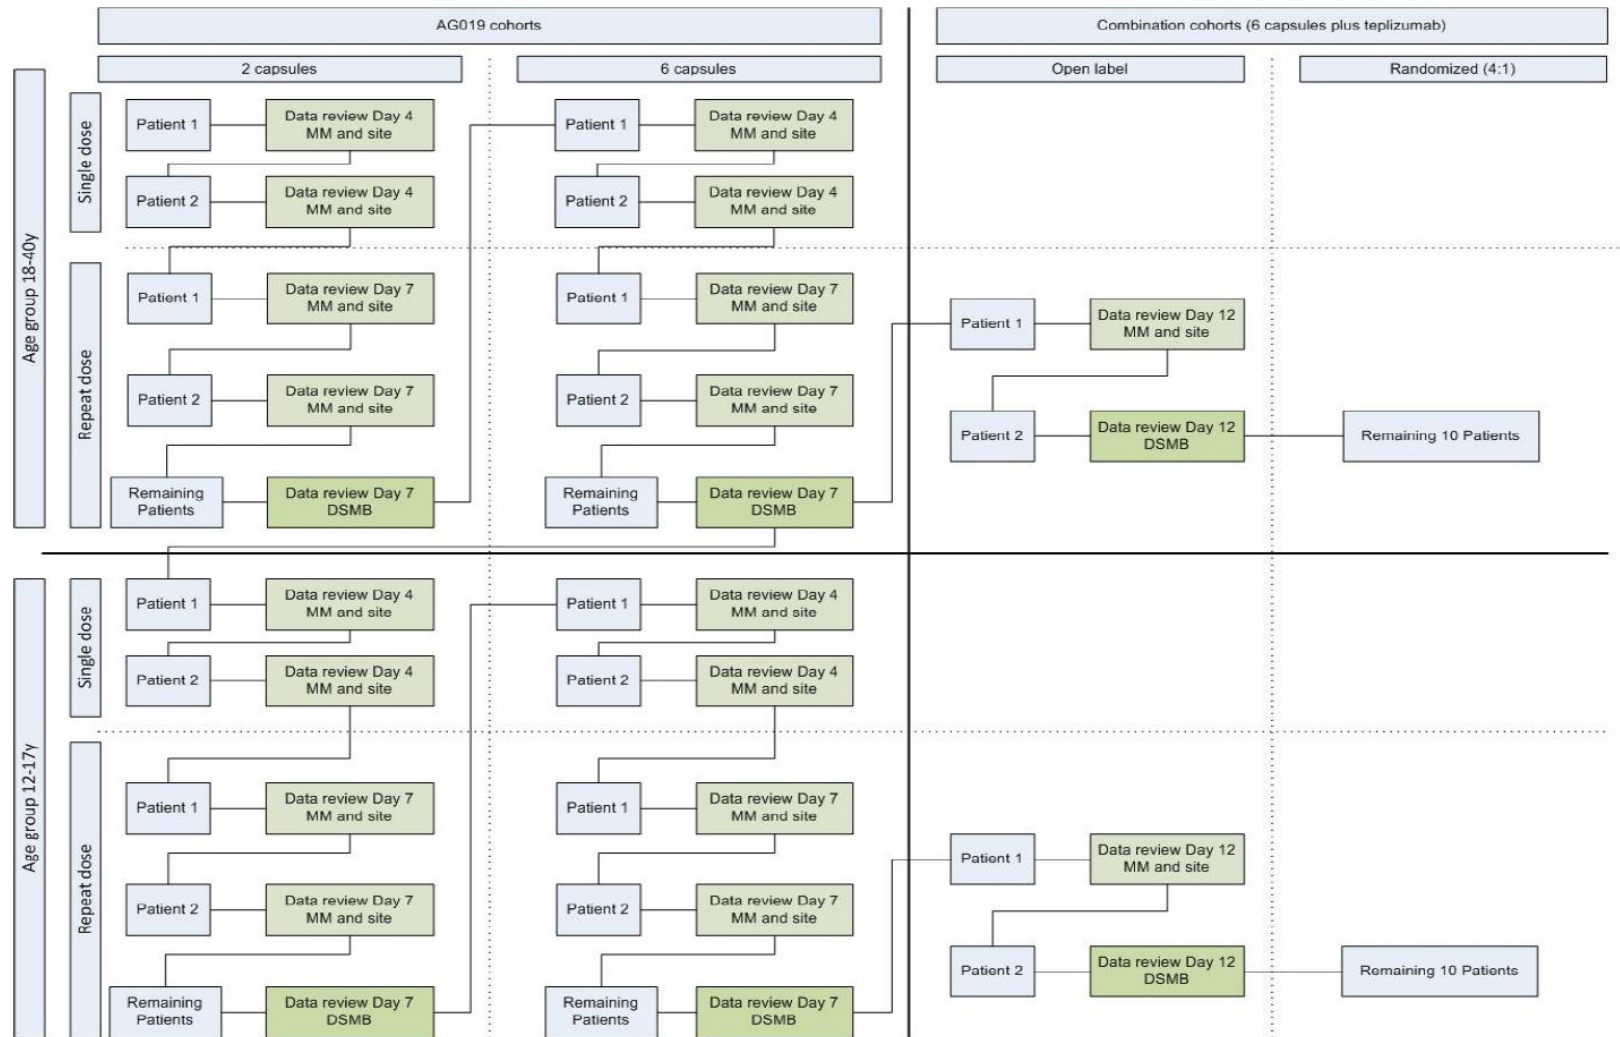

**ESM Fig. 2. Gating strategy for antigen specific CD4 Tr1 (A) and Treg (B) and CD8 (C) T cell populations.**

**A**

Tr1 gating - sample 105-1001 3m\_PPI

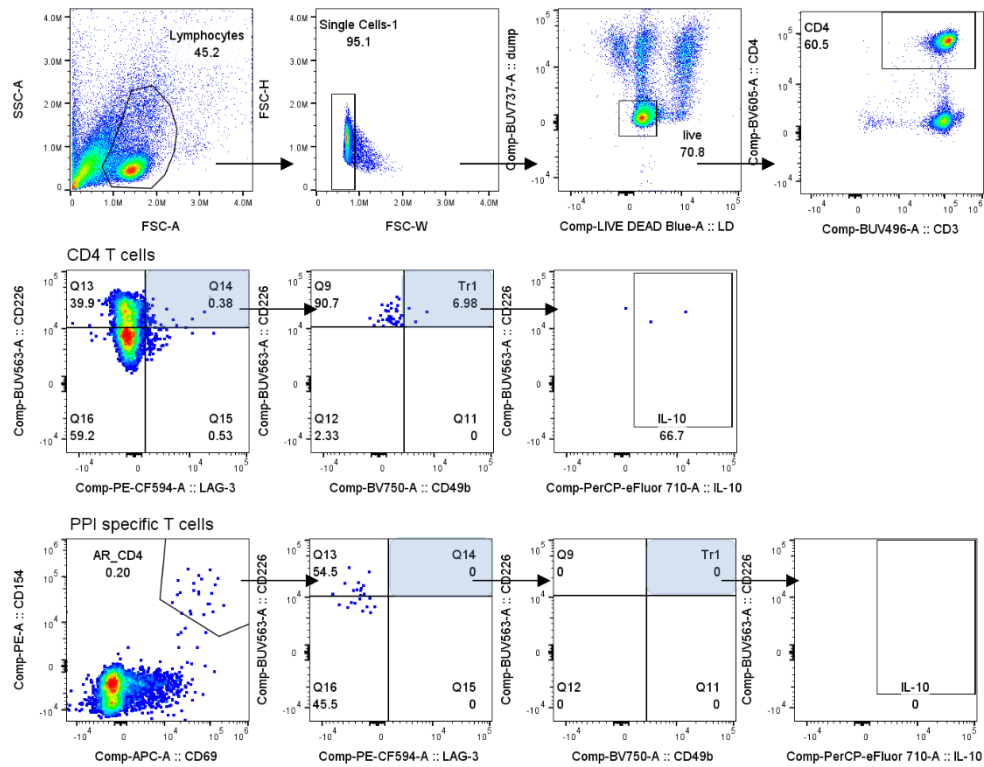

**B**

Treg gating - sample 105-1001 3m\_PPI

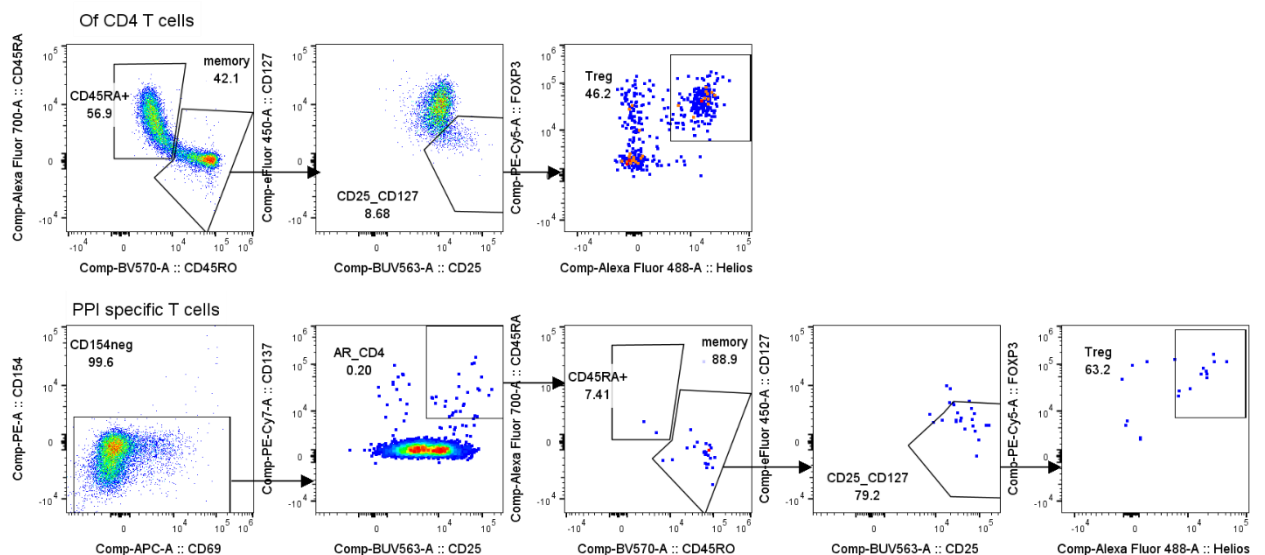

## C CyTOF Boolean Tmr gating

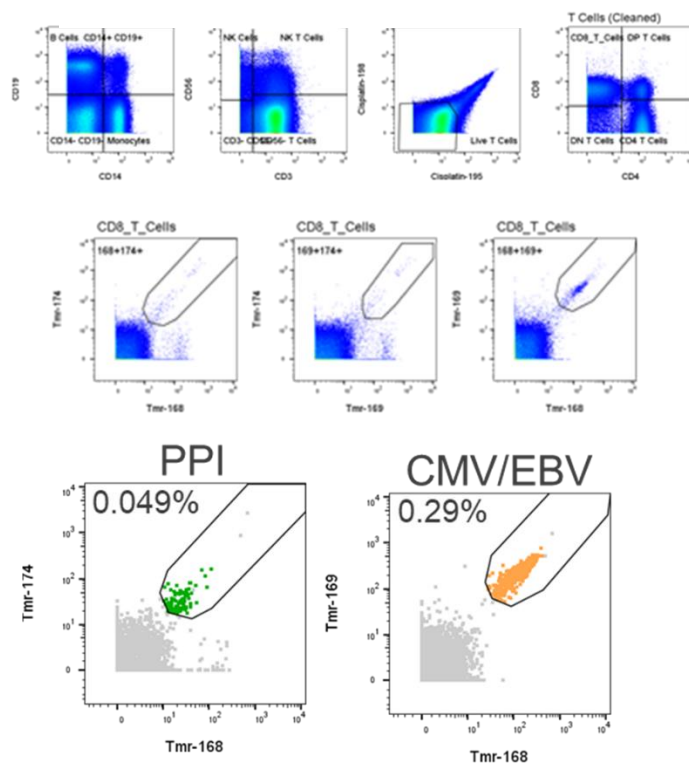



**ESM Fig. 3: C-peptide Over Time in Patients Treated with AG019 Monotherapy, AG019/Teplizumab Combination Therapy and Placebo**

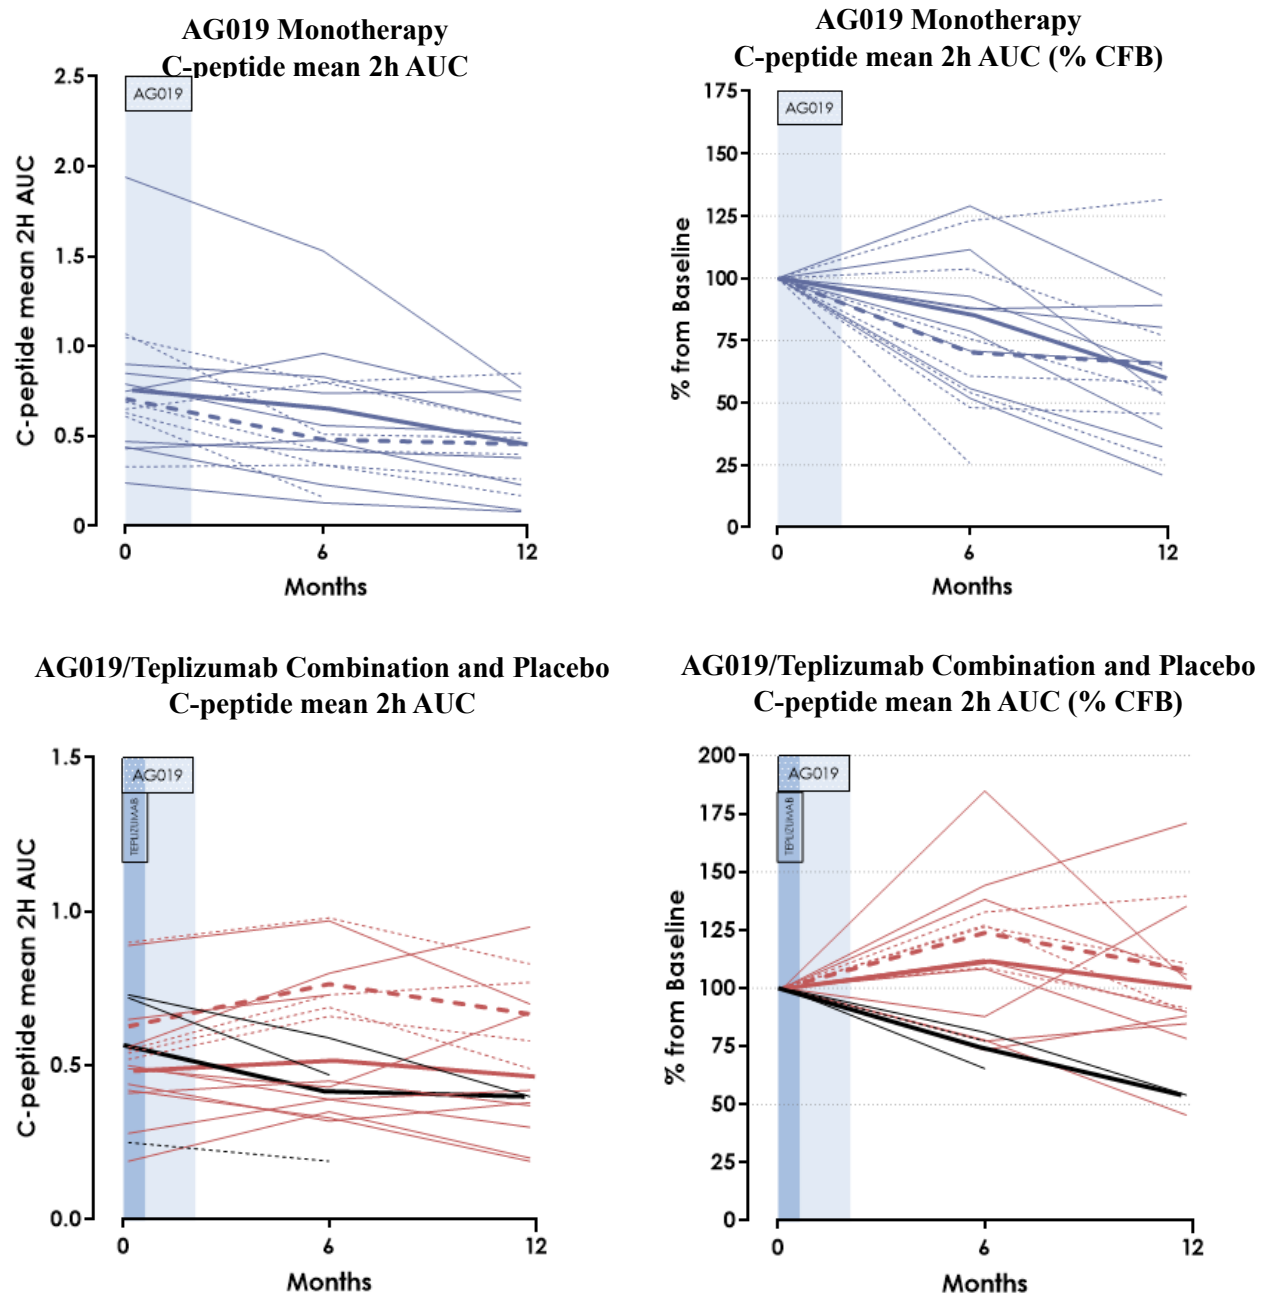

Data are based on the PP Analysis Set. Full lines represent individual (thin) and mean (thick) adult data, dotted lines represent individual (thin) and mean (thick) adolescent data and placebo data are indicated in black. CFB = change from baseline.

**ESM Fig. 4. Mean change from baseline in C-peptide in Clinical Responders and Non-Responders at 6 months in AG019 Monotherapy and AG019/Teplizumab Combination Therapy.**

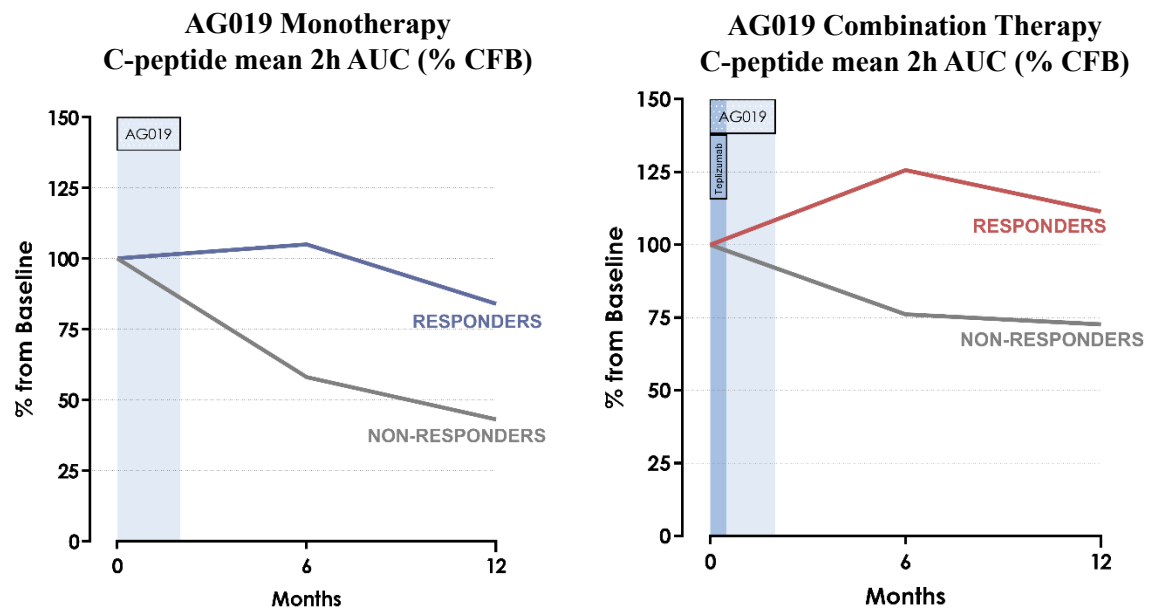

Data are based on a subset of the PP Analysis Set and are presented as mean values. AG019 monotherapy responders (n=7), AG019 monotherapy non-responders (n=9), AG019/Teplizumab combination therapy responders (n=11), AG019/Teplizumab combination therapy non-responders (n=3). CFB = change from baseline.
